# Supplementary material for: Biogenic Volatile Organic Compounds and Protein Expressions of Chamaecyparis formosensis and Chamaecyparis obtusa var. formosana Leaves under Different Light Intensities and Temperatures
Source: MDPI journal article supplement (doi:10.3390/plants11121535), 2022-06-08
Supplement: s1 [file s1]

## *Supplementary Materials*

# **Biogenic volatile organic compounds and protein expressions of *Chamaecyparis formosensis* and *Chamaecyparis obtusa* var. *formosana* leaves under different light intensities and temperatures**

Ying-Ju Chen<sup>1,2</sup>, Ya-Lun Huang<sup>1,†</sup>, Yu-Han Chen<sup>1</sup>, Shang-Tzen Chang<sup>1\*</sup>, Ting-Feng Yeh<sup>1\*</sup>

<sup>1</sup> School of Forestry and Resource Conservation, National Taiwan University, Taipei 10617, Taiwan

<sup>2</sup> Division of Forest Chemistry, Taiwan Forestry Research Institute, Taipei 10070, Taiwan

<sup>†</sup> Current address: Department of Life Science, National Taiwan University, Taipei 10617, Taiwan

\*Correspondence: peter@ntu.edu.tw (S.-T.C.); stfyeh@ntu.edu.tw (T.-F.Y.).

## **Supplementary Material Content**

|                             |                |
|-----------------------------|----------------|
| Supplementary methods.....  | Page S2 - S4   |
| Supplementary Tables.....   | Page S5 - S12  |
| Supplementary Figures ..... | Page S13 - S17 |

## Supplementary methods

### Simple sequence repeat (SSR) genotyping

In order to reduce the effects of individual variance, different saplings from the same species with similar genetic structures were selected by using SSR genotyping technique. The molecular marker used in this study was short tandem repeat sequence. All molecular markers were provided by Dr. Kuo-Fang Chung, Biodiversity Research Center, Academia Sinica, Taiwan. In each species, different sets of molecular markers were used. *C. formosensis*: No4 (159 bp), No35 (193 bp), No47 (153 bp), No88 (130 bp), and *C. obtusa* var. *formosana*: No76 (156 bp), No77 (170 bp), No99 (177 bp). The primer sequences were shown in Table S4 [1]. Genomic DNA of both tree species were isolated and amplified by polymerase chain reaction (PCR) using the aforementioned primers which were fluorescent-labelled with either 6-carboxyfluorescein (6-FAM) or 4,5-dichloro-dimethoxy-fluorescein (JOE). The genotyping of PCR product was analyzed with the automatic sequencer with fluorescent capillary (3730XL DNA Analyzer, Genomics, New Taipei City, Taiwan), and then was interpreted by GeneMapper 4.0 (Applied Biosystems, Thermo Fisher Scientific, USA).

The genetic structure and composition of 56 *C. formosensis* and 55 *C. obtusa* var. *formosana* saplings were assigned by the genotyping results using the Structure Software (Version 2.3.4, Pritchard Lab, Stanford University, USA) [2]. The optimal number of clusters (K) and adjust  $\Delta K$  values were calculated according to Evanno method [3] and the network software Structure Harvester Version 0.6.8 [4].

According to the results of Bayesian clustering analysis, the optimal numbers of clusters (K) of *C. formosensis* and *C. obtusa* var. *formosana* were 13 and 10, respectively. The genetic backgrounds of different saplings for both species were presented with different color combinations (Figure S3), and saplings with similar color combinations indicated that they tended to share similar genetic backgrounds [5]. According to the results in Figure S3, 36 *C. formosensis* and 47 *C. obtusa* var. *formosana* saplings were further selected for subsequent BVOC chemotype analysis.

## BVOC chemotype analysis

To further differentiate the chemotypes of the 36 *C. formosensis* and 47 *C. obtusa* var. *formosana*, the volatile terpenoid compounds of leaves from these saplings were analyzed according to the static-headspace (Static-HS) method described by Chen et al. (2015) [6]. Twenty mg of leaves from individual sapling was cut and put in a 22 mL sample vial. The BVOCs of these samples were extracted with Turbomatrix 40 Static-HS (PerkinElmer Inc., USA) and analyzed with gas chromatography-mass spectrometry (Clarus 600 GC-MS system, PerkinElmer Instruments, USA). Headspace equilibrium temperature was set to 150°C for 30 min. The released volatile components by heating were directly introduced into the GC-MS for analysis. The temperature of injection needle and the transfer line were set 160°C and 170°C, respectively, and the injection time was 0.02 min.

Cluster analysis was used to analyze the chemical component of BVOCs collected by Static-HS from *C. formosensis* and *C. obtusa* var. *formosana* saplings. The similarity was evaluated by Euclidean distance with UPGMA (Unweighted Pair Group Method with Arithmetic Averages) by MVSP (Multi-Variate Group Statistical Package). Smaller Euclidean distance between two samples means more similar BVOCs components. The results of cluster analysis (Figure S4) indicated that the similarities of chemical composition among the *C. formosensis* all exceeded 95%. On the other hand, although the diversity of chemical composition among individual *C. obtusa* var. *formosana* was greater, the similarities among them were still higher than 60%. To select individual saplings with more homogeneous chemical compositions for the subsequent tests to reduce the probable interference of treatment effects caused by individual variation, nine *C. formosensis* plants (among which the similarity exceeded 97%) and nine *C. obtusa* var. *formosana* plants (among which the similarity exceeded 76%) were selected for subsequent physiological and proteomic experiments.

## References for supplementary methods

1. Huang, C.J.; Chu, F.H.; Liu, S.C.; Tseng, Y.H.; Huang, Y.S.; Ma, L.T.; Wang, C.T.; You, Y.T.; Hsu, S.Y.; Hsieh, H.C.; Chen, C.T.; Chao, C.H. Isolation and characterization of SSR and EST-SSR loci in *Chamaecyparis formosensis* (Cupressaceae). *Appl. Plant Sci.* **2018**, *6*, e01175, doi:10.1002/aps3.1175.
2. Pritchard, J.K.; Stephens, M.; Donnelly, P. Inference of population structure

- using multilocus genotype data. *Genetics* **2000**, *155*, 945-959, doi:10.1093/genetics/155.2.945.
3. Evanno, G.; Regnaut, S.; Goudet, J. Detecting the number of clusters of individuals using the software STRUCTURE: a simulation study. *Mol. Ecol.* **2005**, *14*, 2611-2620, doi:10.1111/j.1365-294X.2005.02553.x.
  4. Earl, D.A.; Vonholdt, B.M. STRUCTURE HARVESTER: a website and program for visualizing STRUCTURE output and implementing the Evanno method. *Conserv. Genet. Resour.* **2012**, *4*, 359-361, doi:10.1007/s12686-011-9548-7.
  5. Hsieh, H.L.; Ma, L.T.; Wang, S.Y.; Chu, F.H. Cloning and expression of a sesquiterpene synthase gene from *Taiwania cryptomerioides*. *Holzforschung* **2015**, *69*, 1041-1048, doi:10.1515/hf-2014-0279.
  6. Chen, Y.J.; Lin, C.Y.; Cheng, S.S.; Chang, S.T. Rapid discrimination and feature extraction of three *Chamaecyparis* species by static-HS/GC-MS. *J. Agric. Food Chem.* **2015**, *63*, 810-820, doi:10.1021/jf505587w.

## Supplementary Tables

**Table S1.** Schematic representation of 2D-DIGE experimental design

**Table S2.** Identification results of different expressed proteins of sapling leaves of *C. formosensis* under different light intensities and temperatures

**Table S3.** Identification results of different expressed proteins of sapling leaves of *C. obtusa* var. *formosana* under different light intensities and temperatures

**Table S4.** List of primer sequences used in this study

**Table S1.** Schematic representation of 2D-DIGE experimental design

| Gel | Cy2               | Cy3 <sup>a</sup> | Cy5 <sup>a</sup> |
|-----|-------------------|------------------|------------------|
| 1   | Internal standard | 20°C M-1         | 30°C M-1         |
| 2   | Internal standard | 20°C M-2         | 20°C L-1         |
| 3   | Internal standard | 20°C H-1         | 20°C M-3         |
| 4   | Internal standard | 30°C M-2         | 20°C L-2         |
| 5   | Internal standard | 30°C M-3         | 20°C H-2         |
| 6   | Internal standard | 20°C L-3         | 20°C H-3         |

<sup>a</sup> L: PPFD (Photosynthetic photon flux density or light intensity) = 50  $\mu\text{mol m}^{-2} \text{s}^{-1}$ ; M: PPFD = 200  $\mu\text{mol m}^{-2} \text{s}^{-1}$ ; H: PPFD = 350  $\mu\text{mol m}^{-2} \text{s}^{-1}$ .

**Table S2.** Identification results of different expressed proteins of sapling leaves of *C. formosensis* under different light intensities and temperatures

| Functional<br>annotation/Biological<br>process | Sample<br>ID | Short name       | Protein name                                          | Accession<br>No. | Fold changes <sup>a</sup> |                 |               |
|------------------------------------------------|--------------|------------------|-------------------------------------------------------|------------------|---------------------------|-----------------|---------------|
|                                                |              |                  |                                                       |                  | PPFD<br>200/50            | PPFD<br>350/200 | Temp<br>30/20 |
| <i>Photosynthesis</i>                          |              |                  |                                                       |                  |                           |                 |               |
| Photosynthesis                                 | F138         | ClpC2            | Chaperone protein ClpC2                               | Q9SXJ7           | 0.97                      | 1.09            | 0.79          |
| Photosynthesis                                 | F325         | ATPase subunit β | ATP synthase subunit β                                | Q9BA85           | 1.42                      | 1.01            | 0.51          |
| Photosynthesis                                 | F523         | FNR2             | Ferredoxin-NADP reductase, leaf isozyme 2             | Q6ZFI3           | 0.61                      | 1.00            | 1.67          |
| Photosynthesis                                 | F541         | Cyt f            | Cytochrome f                                          | B1VKB7           | 0.29                      | 0.86            | 3.96          |
| Photosynthesis                                 | F568         | CDSP32           | Thioredoxin-like protein CDSP32                       | Q9SGS4           | 1.31                      | 1.27            | 1.17          |
| Photosynthesis                                 | F647         | OEE2             | Oxygen-evolving enhancer protein 2                    | P85189           | 0.75                      | 1.16            | 1.40          |
| Calvin cycle                                   | F261-1       | RBP-α            | RuBisCO large subunit-binding protein subunit α       | P08926           | 0.62                      | 0.83            | 1.68          |
| Calvin cycle                                   | F261-2       | RBP-α            | RuBisCO large subunit-binding protein subunit α       | P08926           | 0.62                      | 0.83            | 1.68          |
| Calvin cycle                                   | F345         | RBCL             | Ribulose biphosphate carboxylase large chain          | P48696           | 0.93                      | 0.99            | 0.74          |
| Calvin cycle                                   | F354         | RBCL             | Ribulose biphosphate carboxylase large chain          | P48696           | 0.92                      | 0.97            | 0.63          |
| Calvin cycle                                   | F437         | RA A             | Ribulose biphosphate carboxylase/oxygenase activase A | Q40073           | 1.38                      | 1.20            | 0.81          |
| Calvin cycle                                   | F489         | RBCL             | Ribulose biphosphate carboxylase large chain          | A6MMV2           | 0.42                      | 1.01            | 2.57          |
| Calvin cycle                                   | F518         | RBCL             | Ribulose biphosphate carboxylase large chain          | Q32026           | 0.44                      | 0.92            | 2.19          |
| Calvin cycle                                   | F521         | RBCL             | Ribulose biphosphate carboxylase large chain          | Q3V526           | 1.35                      | 1.06            | 0.62          |
| Calvin cycle                                   | F534         | RBCL             | Ribulose biphosphate carboxylase large chain          | P48696           | 0.26                      | 0.63            | 3.14          |
| Calvin cycle                                   | F539         | RBCL             | Ribulose biphosphate carboxylase large chain          | Q32026           | 0.27                      | 0.85            | 3.65          |
| Calvin cycle                                   | F561         | RBCL             | Ribulose biphosphate carboxylase large chain          | P31184           | 1.07                      | 1.17            | 0.73          |

**Table S2.** Identification results of different expressed proteins of sapling leaves of *C. formosensis* under different light intensities and temperatures (*continued*)

| Functional annotation/Biological process | Sample ID | Short name              | Protein name                                 | Accession No. | Fold change <sup>a</sup> |              |            |
|------------------------------------------|-----------|-------------------------|----------------------------------------------|---------------|--------------------------|--------------|------------|
|                                          |           |                         |                                              |               | PPFD 200/50              | PPFD 350/200 | Temp 30/20 |
| Calvin cycle                             | F575      | RBCL                    | Ribulose biphosphate carboxylase large chain | A8W3D6        | 0.65                     | 1.20         | 1.63       |
| Calvin cycle                             | F599      | RBCL                    | Ribulose biphosphate carboxylase large chain | P24671        | 1.25                     | 1.10         | 0.70       |
| Calvin cycle                             | F607-1    | RBCL                    | Ribulose biphosphate carboxylase large chain | P34915        | 0.76                     | 1.06         | 1.43       |
| Calvin cycle                             | F607-2    | Cbby                    | CBBY-like protein                            | Q94K71        | 0.76                     | 1.06         | 1.43       |
| Calvin cycle                             | F607-3    | TPI                     | Triosephosphate isomerase                    | P48496        | 0.76                     | 1.06         | 1.43       |
| Calvin cycle                             | F613      | RBCL                    | Ribulose biphosphate carboxylase large chain | P48696        | 0.73                     | 0.90         | 0.99       |
| Calvin cycle                             | F626      | RBCL                    | Ribulose biphosphate carboxylase large chain | P48695        | 0.35                     | 1.25         | 4.06       |
| Calvin cycle                             | F682      | RBCL                    | Ribulose biphosphate carboxylase large chain | P36479        | 1.24                     | 1.04         | 0.76       |
| Calvin cycle                             | F720      | RBCL                    | Ribulose biphosphate carboxylase large chain | P48696        | 2.34                     | 0.88         | 1.77       |
| Calvin cycle                             | F728      | RBCL                    | Ribulose biphosphate carboxylase large chain | P48696        | 2.92                     | 0.90         | 1.65       |
| Photorespiration                         | F329      | ATPase subunit $\alpha$ | ATP synthase subunit $\alpha$                | P0C522        | 1.32                     | 1.06         | 0.66       |
| Photorespiration                         | F366      | GGAT                    | Glutamate-glyoxylate aminotransferase        | Q9S7E9        | 1.25                     | 1.10         | 0.65       |
| Photorespiration                         | F371      | GGAT                    | Glutamate-glyoxylate aminotransferase 2      | Q9S7E9        | 1.38                     | 1.10         | 0.69       |
| Photorespiration                         | F439      | GCVT                    | Glycine cleavage system T protein            | P54260        | 1.23                     | 1.18         | 0.77       |
| <b>Carbon metabolism</b>                 |           |                         |                                              |               |                          |              |            |
| Calvin cycle                             | F205      | TK                      | Transketolase                                | Q7SIC9        | 1.22                     | 1.28         | 0.70       |
| Calvin cycle                             | F211      | TK                      | Transketolase                                | Q43848        | 1.38                     | 1.09         | 0.55       |
| Glycolysis                               | F304      | MIP synthase            | Inositol-3-phosphate synthase                | Q9FYV1        | 1.33                     | 1.19         | 0.70       |



**Table S2.** Identification results of different expressed proteins of sapling leaves of *C. formosensis* under different light intensities and temperatures (*continued*)

| Functional annotation/Biological process        | Sample ID | Short name                | Protein name                                                           | Accession No. | Fold change <sup>a</sup> |              |            |
|-------------------------------------------------|-----------|---------------------------|------------------------------------------------------------------------|---------------|--------------------------|--------------|------------|
|                                                 |           |                           |                                                                        |               | PPFD 200/50              | PPFD 350/200 | Temp 30/20 |
| Glycolysis                                      | F314      | PK                        | Pyruvate kinase                                                        | Q42954        | 0.78                     | 0.78         | 0.80       |
| Glycolysis                                      | F393      | AGPL4                     | Glucose-1-phosphate adenylyltransferase large subunit 4                | Q0D7I3        | 0.40                     | 0.95         | 2.48       |
| Glycolysis                                      | F394      | AGPL4                     | Glucose-1-phosphate adenylyltransferase large subunit 4                | Q0D7I3        | 0.63                     | 0.90         | 2.12       |
| Glycolysis                                      | F438      | FBA4                      | Fructose-bisphosphate aldolase 4                                       | F4KGQ0        | 1.13                     | 1.14         | 0.82       |
| <b><i>Amino acid and protein processing</i></b> |           |                           |                                                                        |               |                          |              |            |
| Met cycle                                       | F172      | MetE2                     | 5-Methyltetrahydropteroyltriglutamate-homocysteine methyltransferase 2 | Q2QLY4        | 1.92                     | 1.19         | 0.47       |
| Met cycle                                       | F368      | SAMS2                     | S-Adenosylmethionine synthase 2                                        | Q9FUZ1        | 1.57                     | 1.14         | 0.49       |
| Met cycle                                       | F370-1    | SAMS2                     | S-Adenosylmethionine synthase 2                                        | Q9FVG7        | 1.30                     | 1.12         | 0.74       |
| Met cycle                                       | F380      | SAMS2                     | S-Adenosylmethionine synthase 2                                        | A9NYY0        | 1.76                     | 1.23         | 0.53       |
| <b><i>Signal transduction</i></b>               |           |                           |                                                                        |               |                          |              |            |
| Cytoskeleton                                    | F370-2    | Actin-7                   | Actin-7                                                                | P53492        | 1.30                     | 1.12         | 0.74       |
| Cytoskeleton                                    | F408      | Actin-7                   | Actin-7                                                                | P53492        | 1.21                     | 1.20         | 0.82       |
| <b><i>Stress/defense</i></b>                    |           |                           |                                                                        |               |                          |              |            |
| Stress/defense                                  | F504      | -                         | Probable aldo-keto reductase 1                                         | B8ASB2        | 0.66                     | 1.12         | 1.59       |
| Stress/defense                                  | F520      | PLP synthase subunit PDX1 | Probable pyridoxal 5'-phosphate synthase subunit PDX1                  | Q39963        | 0.77                     | 1.06         | 1.64       |

<sup>a</sup> PPFD: light intensity,  $\mu\text{mol m}^{-2} \text{s}^{-1}$ ; Temp: temperature, °C.

**Table S3.** Identification results of different expressed proteins of sapling leaves of *C. obtusa* var. *formosana* under different light intensities and temperatures

| Functional annotation/Biological process | Sample ID | Short name | Protein name                                                         | Accession No. | Fold change <sup>a</sup> |              |            |  |
|------------------------------------------|-----------|------------|----------------------------------------------------------------------|---------------|--------------------------|--------------|------------|--|
|                                          |           |            |                                                                      |               | PPFD 200/50              | PPFD 350/200 | Temp 30/20 |  |
| <i>Photosynthesis</i>                    |           |            |                                                                      |               |                          |              |            |  |
| Photosynthesis                           | O162      | HCF101     | Fe-S cluster assembly factor HCF101                                  | Q6STH5        | 0.89                     | 0.95         | 1.21       |  |
| Photosynthesis                           | O390      | Lhcb6      | Chlorophyll a-b binding protein 6A                                   | P12360        | 1.35                     | 1.02         | 0.94       |  |
| Photosynthesis                           | O397      | OEE2       | Oxygen-evolving enhancer protein 2                                   | P85189        | 1.15                     | 0.79         | 1.04       |  |
| Calvin cycle                             | O133      | RBP-β      | RuBisCO large subunit-binding protein subunit β                      | P08927        | 0.99                     | 1.12         | 0.98       |  |
| Calvin cycle                             | O347      | RA A       | Ribulose biphosphate carboxylase/oxygenase activase A                | Q40073        | 0.91                     | 1.13         | 1.21       |  |
| Calvin cycle                             | O351-1    | RBCL       | Ribulose biphosphate carboxylase large chain                         | P48696        | 0.77                     | 1.04         | 1.02       |  |
| Calvin cycle                             | O351-2    | RBCL       | Ribulose biphosphate carboxylase large chain                         | Q3V526        | 0.77                     | 1.04         | 1.02       |  |
| Calvin cycle                             | O353      | RBCL       | Ribulose biphosphate carboxylase large chain                         | A0ZZ43        | 0.74                     | 0.95         | 1.23       |  |
| Calvin cycle                             | O402      | RBCL       | Ribulose biphosphate carboxylase large chain                         | P24680        | 1.29                     | 1.02         | 0.63       |  |
| Calvin cycle                             | O405      | RBCL       | Ribulose biphosphate carboxylase large chain                         | Q37328        | 0.65                     | 1.01         | 1.31       |  |
| <i>Carbon metabolism</i>                 |           |            |                                                                      |               |                          |              |            |  |
| Calvin cycle                             | O98       | TK         | Transketolase, chloroplastic                                         | Q43848        | 1.03                     | 1.17         | 0.92       |  |
| <i>Amino acid and protein processing</i> |           |            |                                                                      |               |                          |              |            |  |
| Met cycle                                | O79       | MetE2      | 5-methyltetrahydropteroyltriglutamate-homocysteine methyltransferase | Q42662        | 1.27                     | 1.23         | 0.71       |  |

**Table S3.** Identification results of different expressed proteins of sapling leaves of *C. obtusa* var. *formosana* under different light intensities and temperatures (*continued*)

| Functional<br>annotation/Biological<br>process | Sample<br>ID | Short name  | Protein name                                              | Accession<br>No. | Fold change <sup>a</sup> |                 |               |
|------------------------------------------------|--------------|-------------|-----------------------------------------------------------|------------------|--------------------------|-----------------|---------------|
|                                                |              |             |                                                           |                  | PPFD<br>200/50           | PPFD<br>350/200 | Temp<br>30/20 |
| <i>Signal transduction</i>                     |              |             |                                                           |                  |                          |                 |               |
| Cytoskeleton                                   | O318         | GB1         | Guanine nucleotide-binding protein subunit β-like protein | O24076           | 0.65                     | 1.18            | 1.37          |
| <i>Stress/defense</i>                          |              |             |                                                           |                  |                          |                 |               |
| Stress/defense                                 | O328         | APX5        | Probable L-ascorbate peroxidase 5                         | P0C0L0           | 1.75                     | 0.67            | 1.15          |
| Stress/defense                                 | O343         | 40S RP S3-1 | 40S ribosomal protein S3-1                                | Q9SIP7           | 1.54                     | 0.87            | 0.87          |

<sup>a</sup> PPFD: light intensity,  $\mu\text{mol m}^{-2} \text{s}^{-1}$ ; Temp: temperature,  $^{\circ}\text{C}$ .

**Table S4.** List of primer sequences used in this study

| Primer No. | Primer Name | Forward primer sequence (5' - 3') | Reverse primer sequence (5' - 3') | Predicted length (bp) | Fluorescent Dye <sup>a</sup> |
|------------|-------------|-----------------------------------|-----------------------------------|-----------------------|------------------------------|
| 4          | AGAT78_137  | ACGCTTTCACCTCCATAGTA              | AATAGGGGTTTCCCTACATC              | 159                   | 6-FAM                        |
| 35         | GATA13_3    | GGAGAAAGGAGTGTCAACAAG             | AACTCATTCCTTCTCCCTCT              | 193                   | 6-FAM                        |
| 47         | TATC78_25   | CCTCTCTCTCACCCCTCTAT              | TCTGTATGAGTGTTGCTCCA              | 153                   | JOE                          |
| 76         | TATC27_29   | TCTCATTCAAGTGGTATGTT              | TCATCTTCACGAACCAAGA               | 156                   | JOE                          |
| 77         | TATC74_82   | TGACGTGTCAATCTTTTGG               | AAGAAAAGGTTGCAATGGT               | 170                   | 6-FAM                        |
| 88         | TATC97_18   | GCTTCATCGTCCCTAAGTT               | TTCTGTTCTTGCAAATTGTT              | 130                   | 6-FAM                        |
| 99         | TATG74_148  | GGGAGCTGTAGGGAGATGAA              | ACATTGCAAATAGGGGTATG              | 177                   | JOE                          |

<sup>a</sup> 6-Carboxyfluorescein (6-FAM); 4,5-Dichloro-dimethoxy-fluorescein (JOE).

## Supplementary figure legend

**Figure S1.** Venn diagram showing the number and relationship of proteins differentially expressed for the light intensity and temperature comparisons from the *C. formosensis*. PPFD, photosynthetic photon flux density or light intensity ( $\mu\text{mol m}^{-2} \text{s}^{-1}$ ).

**Figure S2.** Venn diagram showing the number and relationship of proteins differentially expressed for the light intensity and temperature comparisons from the *C. obtusa* var. *formosana*. PPFD, photosynthetic photon flux density or light intensity ( $\mu\text{mol m}^{-2} \text{s}^{-1}$ ).

**Figure S3.** Genetic structure of populations of (a) *C. formosensis*, and (b) *C. obtusa* var. *formosana* saplings.

**Figure S4.** Cluster analysis of the constituents of volatile compounds from (a) *C. formosensis*, and (b) *C. obtusa* var. *formosana* saplings using static-headspace.

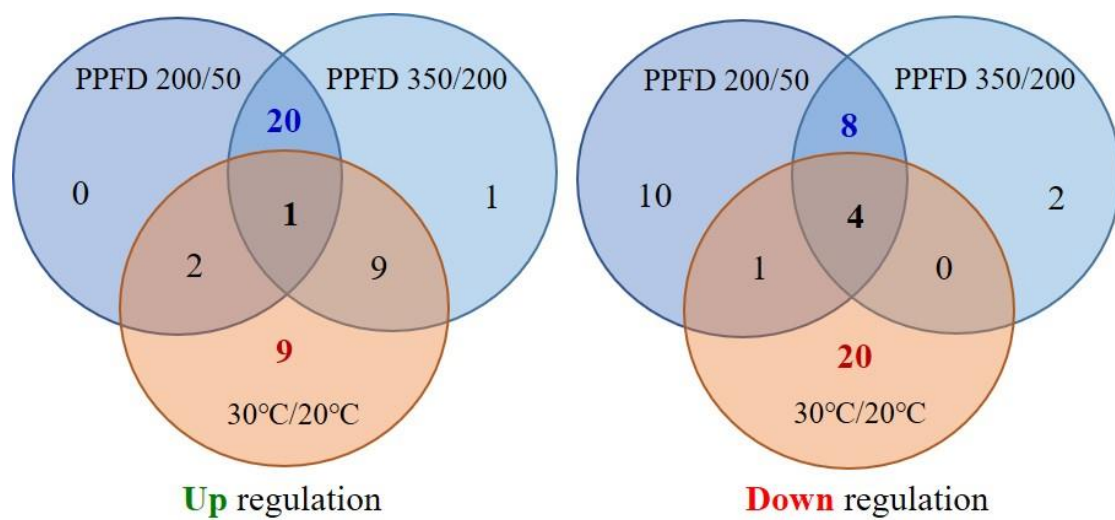

**Figure S1.** Venn diagram showing the number and relationship of proteins differentially expressed for the light intensity and temperature comparisons from the *C. formosensis*. PPFD, photosynthetic photon flux density or light intensity ( $\mu\text{mol m}^{-2} \text{s}^{-1}$ ).

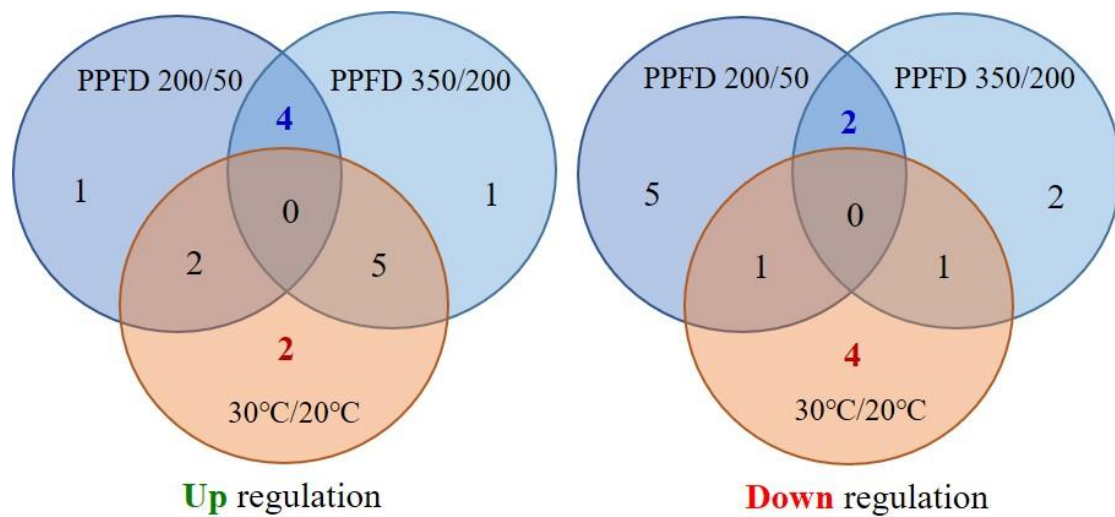

**Figure S2.** Venn diagram showing the number and relationship of proteins differentially expressed for the light intensity and temperature comparisons from the *C. obtusa* var. *formosana*. PPFD, photosynthetic photon flux density or light intensity ( $\mu\text{mol m}^{-2} \text{s}^{-1}$ ).

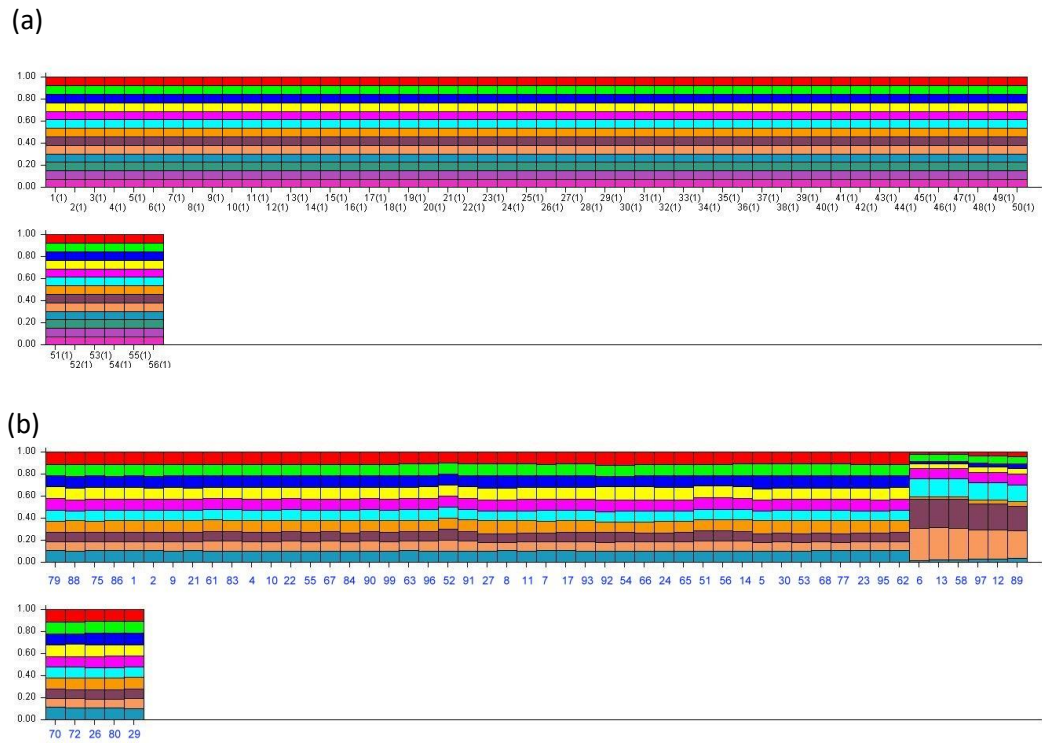

**Figure S3.** Genetic structure of populations of (a) *C. formosensis*, and (b) *C. obtusa* var. *formosana* saplings.



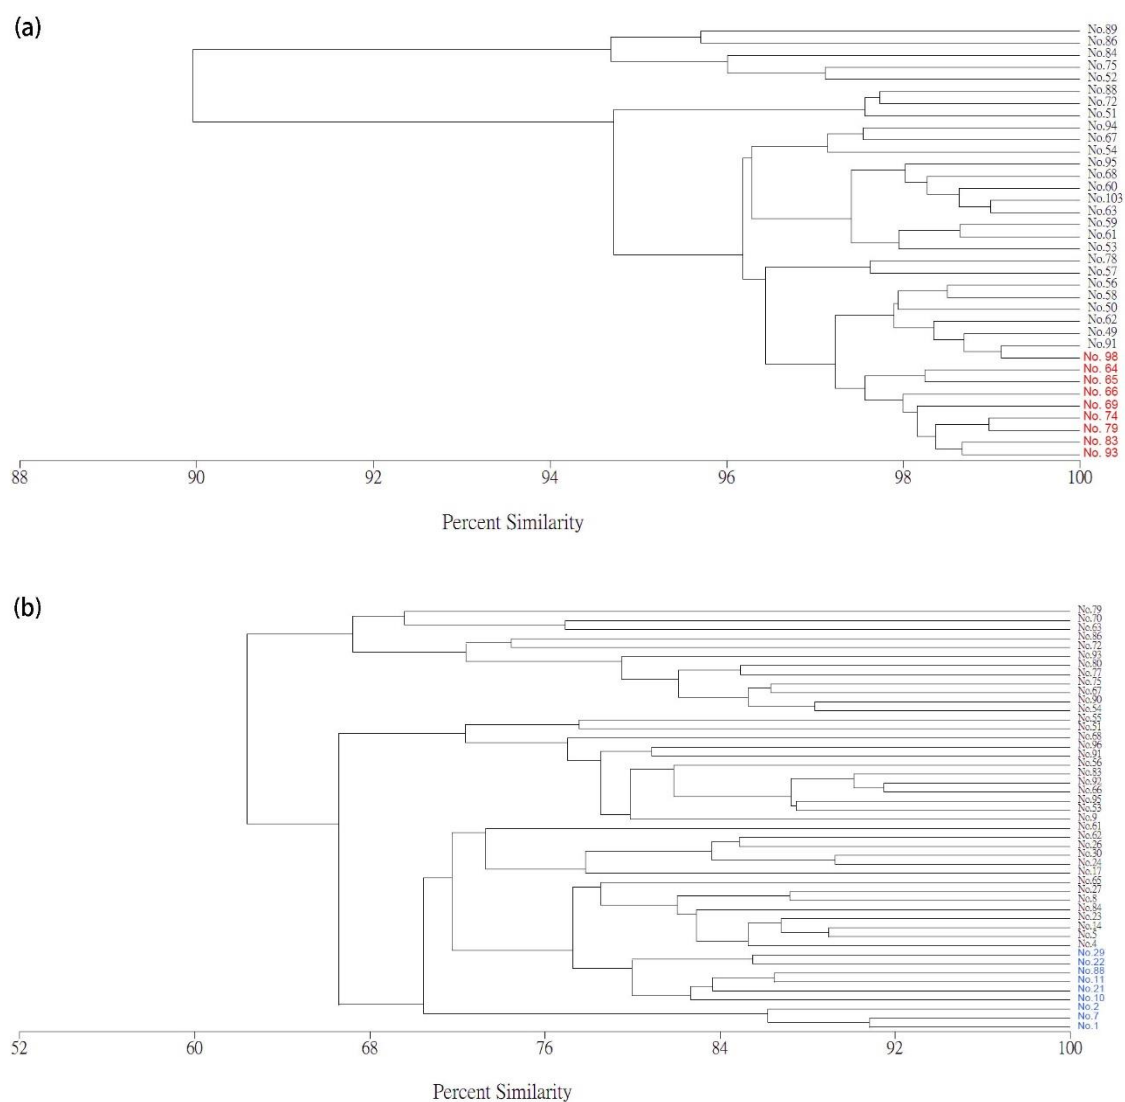

**Figure S4.** Cluster analysis of the constituents of volatile compounds from (a) *C. formosensis*, and (b) *C. obtusa* var. *formosana* saplings using static-headspace.
